# Supplementary material for: Empirical and model-based estimates of spatial and temporalvariations in net primary productivity in semi-arid grasslands ofNorthern China
Source: Copernicus journal article supplement (doi:10.5194/hess-2016-631), 2017-01-20
Supplement: Supplementary file [file hess-2016-631-AC1-supplement.pdf]

Interactive comment on “Empirical and model-based estimates of spatial and temporal variations in net primary productivity in semi-arid grasslands of Northern China” by Shengwei Zhang et al.

### **Reply to Anonymous Referee #1**

We thank Referee #1 for the comments; below we give the reply to the comments.

The authors used a light use efficient model (LUE model, the CASA model) to estimate the net primary productivity (NPP) in grasslands over northern China from 2001-2013. Then they examined the precipitation and temperature influences on the modeled NPP in different seasons. While this study has been carried out with great efforts, some issues have remained in the paper as described below.

1. There are quite a few studies on the NPP distribution over China at regional and national scales, using LUE models or process-based models. However, the literature review on these previous studies is not thorough. It seems that this study has not made much advance from the earlier studies. The authors used the CASA model for a regional NPP estimation for a number of years. This is not scientifically and technically novel and challenging. Such a regional application may not have broad implications so the authors may submit their paper to a journal more for regional applications.

**Reply:** thanks for the suggestions. We added some literatures in introductions part as showed in the revised version of the paper.

2. The discussion on the precipitation and temperature influences are reasonable but these influences are commonly known and are available in literatures.

**Reply:** thanks and we agree to the reviewer’s comment. But in this paper we gave the quantitative different about correlations and partial correlations between NPP and temperature and precipitation, also we analysis the relationship between grazing and NPP in our study area it is different with other research results.

3. There are many critical descriptions missing in the paper that hampers the reader from understanding how NPP is derived. For example, in Equation 1, how is  $\epsilon$  derived? Does it depend on vegetation type? If so, how? Scientists have improved the expression of  $\epsilon$  since the LUE idea was first proposed and thus  $\epsilon$  can depend on several environmental variables. Is this also the case for this study? If so, how? How is soil moisture considered in the model? Or has the model not considered soil moisture in this application? The authors only provided the source for NDVI in the model. How about SOL and FPAR?

**Reply:** thanks and we agree to the reviewer’s comment, we add some equations and describe about how the NPP derived and more describe about the input data. Which showed in the revised version of the paper.

## Reply to Anonymous Referee #2

We thank Referee #1 for the comments; below we give the reply to the comments.

The paper entitled “Empirical and model-based estimates of spatial and temporal variations in net primary productivity in semi-arid grasslands of Northern China” by S. Zhang et al. presents an analysis on the impact of both temperature and precipitation on grassland NPP estimations obtained using a light-use efficiency model. The topic (climate control on NPP), although interesting, is far from the HESS scope and is probably more suitable for the sister EGU journal Biogeosciences. The paper is methodologically obscure as both the modelling approach and datasets applied in the study are poorly documented, which strongly hinders the reproducibility of the study. Furthermore, I have major concerns on the type of model chosen for estimating NPP, the data quality, and the (too simplistic) analysis presented in the study about the climate-driven controls on NPP.

Major concerns:

1. Model type: The authors applied the CASA model, a light-use efficiency model, to simulate the inter-annual dynamics of semi-arid grassland NPP. Vegetation production in drylands is limited mainly by water availability. Any attempt to model the dynamics of vegetation production in semi-arid landscapes must consider, at least, the dynamics of soil moisture availability.

**Reply:** thanks and we agree to the reviewer’s comment. In CASA model the water stress is defined as moisture stress coefficient ( $W_e(x, t)$ ), we added the describe about it in the revised version of the paper.

2. Model details: The authors apparently fed the CASA model using MODIS NDVI data for estimating NPP. The model is described in the study in just two equations: an equation for APAR (that is proportional to FPAR and solar radiation) and another equation linking NPP with APAR. No details are described on how FPAR and solar radiation have been calculated. Furthermore, it is not clear how the authors have applied the NDVI data to feed the model. In fact, the variable NDVI is not included in the equations.

**Reply:** thanks and we agree to the reviewer’s comment. We added some equations and describe about how the NPP derived and more describe about the input data. Which showed in the revised version of the paper.

3. Use of NDVI data: In arid and semi-arid landscapes, where vegetation cover is sparse and generally low, NDVI data is strongly affected by the soil background properties. Bearing in mind that the study covers a very broad area of approx. 200,000 Km<sup>2</sup> where soil characteristics can change dramatically between locations, the use of NDVI data is undesirable. The use of either EVI or MSAVI is probably far more appropriate for this

application.

**Reply:** thanks for the comment, the CASA model uses NDVI data to estimated NPP had been test a lots from globe to regional scale with variations remote sensing data as mentioned in the introduction of the revised version of this paper.

4. Verification of NPP estimates: The authors indicate that “monitoring data from 46 monitoring stations within the Xilingol League collected in July 2011 (g C m<sup>-2</sup> year<sup>-1</sup>) were compared with simulated NPP for 2011”. However, the field-based NPP data is not described in any way in the paper. How was NPP measured in the field? What size were the plots? Were the NPP estimations obtained by a single harvest in July 2011? Please, note that a single harvest of aboveground biomass does not represent accurately NPP in perennial grasslands (the type of vegetation analyzed in the paper). Biomass harvests must be taken both at the beginning and at the peak of the growing season to obtain a valid NPP estimate.

**Reply:** thanks and we agree to the reviewer’s comment. More detail was added about the filed NPP in the revised version of this paper.

5. Climate data: Meteorological data for both the NPP estimations and the analysis of the NPP-climate relations was obtained by simple kriging interpolation from nine meteorological stations. Nine stations for an area of 193,000 km<sup>2</sup> is probably too little information to sustain an accurate estimation of spatially-distributed climate/meteorological variables for the full area. Furthermore, I expect that, in an area as big as 193,000 km<sup>2</sup>, topographical variations (e.g. local differences in elevation) can have a very important role in local climate and meteorology. Did the authors check for the influence of elevation and other topographical variables on the meteorological records of the stations? The use of kriging with varying local means, kriging with external drift and co-kriging can improve considerably the spatial interpolation of meteorological variables where local elevations (and other topographical factors) have a relevant role.

**Reply:** thanks for the comment. We didn’t use co-kriging to interpolate meteorological data. Because in mostly of the papers used CASA to simulate NPP they use kriging or IDW to interpolate climate data, we did this according to those literatures.

6. Livestock stocking density data: The authors indicate the source for the livestock data (a paper by Yang, 2015), but should also detail how this data was generated, since the source is in Chinese. Furthermore, the data is expressed in animal units (e.g. in Fig. A2) and should be expressed in density units (i.e. animals km<sup>-2</sup>).

**Reply:** thanks and we agree to the reviewer’s comment. More detail was added about the livestock data in the revised version of the paper. The data in Fig. A2 can be showed in density or in total number because the area is same in different year. But we changed

the title to “Figure A2. (a) Number of livestock (solid red line) and change in the NPP (broken blue line) and (b) the correlation between the number of livestock and the change in the NPP” to make clear for the reader.

7. Data analysis: The authors apply simple correlations to analyze the impact of temperature and rainfall on NPP. This type of analysis is too simplistic and does not provide any novel information to that already published on this topic.

**Reply:** thanks for the comment. Same answer as reply to the comment 2 of Referee #1, in this paper we gave the quantitative different about correlations and partial correlations between NPP and temperature and precipitation, also we analysis the relationship between grazing and NPP in our study area it is different with other research results.

Revised version of the paper.

# Empirical and model-based estimates of spatial and temporal variations in net primary productivity in semi-arid grasslands of Northern China

Shengwei Zhang<sup>1,2</sup>, Rui Zhang<sup>1</sup>, Tingxi Liu<sup>1\*</sup>, Xin Song<sup>2</sup>, Mark A. Adams<sup>2</sup>

<sup>1</sup>College of Water Conservancy and Civil Engineering, Inner Mongolia Agricultural University, Hohhot, 010018, China

<sup>2</sup>Faculty of Agriculture and Environment, University of Sydney, Sydney, 2570, Australia

*Correspondence to:* T. X. Liu (txliu1966@163.com) and S.W. Zhang(zsw@imau.edu.cn)

**Abstract.** Spatiotemporal variations in net primary productivity (NPP) of vegetation offer insights to surface water and carbon dynamics, and are closely related to temperature and precipitation. We employed the Carnegie-Ames-Stanford Approach ecosystem model to estimate NPP of semiarid grassland in northern China between 2001 and 2013. Model estimates were strongly linearly correlated with observed values ( $R^2=0.67$ ,  $RMSE=35 \text{ g C}\cdot\text{m}^{-2}\cdot\text{year}^{-1}$ ). We also quantified inter-annual changes in NPP over the 13-year study period. NPP varied between 141 and 313  $\text{g C}\cdot\text{m}^{-2}\cdot\text{year}^{-1}$ , with a mean of 240  $\text{g C}\cdot\text{m}^{-2}\cdot\text{year}^{-1}$ . NPP increased from west to east each year, and mean precipitation in each county was significantly positively correlated with NPP in annually, summer and autumn. Mean precipitation was also positively correlated with NPP in spring, but the correlation was not significant. Annual and summer temperatures were mostly negatively correlated with NPP, but temperature was positively correlated with spring and autumn NPP. Spatial correlation and partial correlation analyses at the pixel scale confirmed precipitation as a major driver of NPP. Temperature was negatively correlated with NPP in 99% of the regions at the annual scale, but after removing the effect of precipitation, temperature was positively correlated with the NPP in 77% of the regions.

## 1 Introduction

Studies of NPP and meteorological factors provide the basis for theoretical and practical evaluation of local-to-global carbon cycles (Fang, 2002; Li et al., 2016b; Mowll et al., 2015). Derived relationships can also provide guidance for sustainable use of resources and realization of the productive potential of ecosystems (Gang et al., 2013; Li et al., 2013; Tan et al., 2007; Tang et al., 2010). Grasslands are important components of many terrestrial ecosystems (Wang et al., 2014a) and, due to their sensitivity to climate change, they are widely studied in that context (Reeves et al., 2014; Soylu et al., 2011; Wang et al., 2014b; Zhang et al., 2008). Process models are now widely used in exploring underlying biological processes in grasslands (such as photosynthesis and transpiration) as well as mechanisms driving interactions between these processes and environmental parameters (Liu et al., 2011).

Also in recent years, remote sensing data have been used in conjunction with models to estimate

regional NPP(Chirici et al., 2015; Sjöström et al., 2013). For example, the Carnegie-Ames-Stanford Approach (CASA) has been used to estimate changes in the NPP of vegetation(Potter et al., 2012, 1993; Zhang et al., 2016) as well as the efficiency at which NPP uses the products of photosynthetically active radiation (PAR)(Field et al., 1995). Typically, input data for CASA models used to predict NPP over large areas includes thematic mapper (TM) data(Yan et al., 2009) which provides surface distribution of NPP at a relatively high spatial resolution, as well as data from advanced very-high-resolution radiometer (AVHRR)(An et al., 2013), and moderate resolution imaging spectroradiometer (MODIS)(Li et al., 2016a; Sjöström et al., 2013).

Climate (temperature, precipitation, etc.) exerts critical control of vegetation growth in most ecosystems(Liu et al., 2013; Nemani et al., 2003; Reeves et al., 2014) and relationships between NPP and meteorological elements are widely studied using different methods(Michaletz et al., 2014). For example, linear regression and covariance have been used to assess relationships between aboveground NPP (ANPP) and temperature and precipitation (annually and during the growing season)(Mowll et al., 2015). For grassland ecosystems in Inner Mongolia, Zhang et al. estimated the spatial distribution of NPP in the Balager River Basin of the Xilingol Grassland using a light use efficiency model and analysed correlations among climate factors, vegetation indices and NPP. They found that precipitation and monthly mean temperature both correlated well with NPP and that precipitation had a greater impact than temperature(Zhang et al., 2015a). Mu et al. used remote sensing of the vegetation and the CASA model to reveal spatiotemporal dynamics of NPP for different types of vegetation as well as their differences in NPP responses to climate (Mu et al., 2013). Zhang et al. used the CENTURY model to simulate changes in the ANPP of grasslands in Xilinhot and their responses to climate change over the past 58 years. They showed that the ANPP of typical Inner Mongolian grasslands was highly sensitive to climate change, with distinct variation due to changes in temperature and precipitation(Zhang et al., 2012). Gao et al. found that NPP of semiarid grasslands of Inner Mongolia were significantly affected by biomass allocation and precipitation use efficiency(Gao et al., 2011). In addition, human management has a significant impact on NPP(Wang and Wesche, 2016). Lkhagva et al. analysed the effect of grazing on community structure and ANPP of the semiarid grasslands and found that excessive grazing caused reductions in the distribution of bryophytic vegetation, the disappearance of frozen soils, and climate warming(Lkhagva et al., 2013).

Most previous studies have focused on NPP and its relationship to meteorological elements at either annual scales, or during the growing season. Here we attempt to investigate these relationships at different scales and the synergistic interactions between climatic variables. We assessed the NPP dynamics of a semiarid grassland (i.e., the Xilingol Grassland) between 2001 and 2013 using used a remote sensing data-based light use efficiency model in combination with other spatial and temporal data. Correlations and partial correlations between NPP and precipitation and temperature were analysed at the pixel level at both the annual and seasonal scales.

## **2 Materials and methods**

### **2.1 General study area information**

The Xilingol Grassland (115°13'–117°06'E and 43°02'–44°52'N) is located in the Xilingol League in the central Inner Mongolia Autonomous Region to the north of China (Fig.1). This grassland has a

total area of 193,000 km<sup>2</sup> and a usable grassland area of 180,000 km<sup>2</sup>. It can be divided into five main types: typical grasslands, desert grasslands, meadow grasslands, sandy grasslands and others. The study area has a northern temperate continental climate characterized by strong winds as well as arid conditions and cold temperatures. The mean annual temperature is 0–3°C, and the multi-year mean precipitation is 295 mm. Precipitation gradually decreases from the southeast to the northwest and is mostly concentrated in July, August and September.

## 2.2 Data sources and processing

Remote sensing data used in this study - the 500-m×500-m, 8-day composite land surface reflectance product (MOD09A1) from 2001–2013 for the Xilingol League - were obtained from the Land Processes Distributed Active Archive Center of the United States Geological Survey (<https://lpdaac.usgs.gov/>). Normalized difference vegetation index (NDVI) data were obtained by calculation.

Meteorological data (including the monthly mean temperature (°C), monthly precipitation (mm) and sunshine duration (h) from 2001–2013) were obtained from nine national standard meteorological stations of the China Meteorological Administration, namely, the East Ujimqin Banner, Erenhot, Naranbulag (Abag Banner), Abag Banner, Sonid Left Banner, Jurh (Sonid Right Banner), West Ujimqin Banner, Xilinhot and Duolun Meteorological Stations (Fig.1). Raster meteorological data are required for models of the vegetation NPP, and they were obtained by Kriging interpolation of data from the nine meteorological stations, using a module inverse distance weighted routine of the open geographic information system (GIS) software SAGA GIS version 2.2.7 (Conrad et al., 2015). Pixel size and projection type of the resulting raster data were consistent with the NDVI data.

Observed NPP were collected from 46 monitoring stations within the Xilingol in July of 2011 as Fig 1 shows. Three pairs of 0.5m×0.5m quadrats sample plots were investigated in each monitoring stations. Plant's species, high and coverage were investigated, and then all vegetation was clipped at the soil surface and dried in lab at 75°C for 48 h prior to weighing. Aboveground biomass (AGB) was estimated by averaging the biomass of three plots. Belowground biomass (BGB) was collected by root augers with 8.9 cm diameter corresponding to AGB and dried as AGB. Then the total biomass was the sum of AGB and BGB. The conversion coefficient 0.475 was used to conversion biomass(g·m<sup>-2</sup>) to NPP(gC·m<sup>-2</sup>·a<sup>-1</sup>) (Raich et al., 1991).

We also employed data on livestock numbers in the nine counties in the Xilingol League between 2001 and 2013 from the Statistical Yearbooks of the Xilingol League of 2002–2014 (Yang, 2015), including sheep and large livestock (cattle and horses). According to the rules of National Bureau of Statistics of the People's Republic of China since 2008 all the numbers of horse, cow and sheep are from sampling survey. The method used by Li, 2007 was used to convert the data to the unit of a standard sheep (1 head of large livestock (cattle or horse) = 5 standard sheep) (Wen et al., 2007).

## 2.3 NPP estimation model

We applied the CASA model first developed by Potter et al. (1993) and Field et al. (1995) (Field et al., 1995; Potter et al., 1993), which is based on light use efficiency model. A modified version was

developed by Zhu et al.(Zhu et al., 2007), and was used in this study. The main equations for estimating NPP are as follows:

$$NPP(x,t) = APAR(x,t) \times \varepsilon(x,t) \quad (1)$$

$$APAR(x,t) = SOL(x,t) \times FPAR(x,t) \times 0.5 \quad (2)$$

where  $SOL(x,t)$  represents the total solar radiation at pixel  $x$  in month  $t$  ( $\text{MJ m}^{-2} \text{ month}^{-1}$ ), and  $FPAR(x,t)$  represents the fraction of the incident PAR absorbed by the vegetation, The value of 0.5 stands for the fraction of total solar radiation that can be used by vegetation (0.38–0.71mm).

The FPAR can be expressed based on the relationships between FPAR and NDVI as well as Simple Ratio (SR), which are calculated from Eqs 3 to 6:

$$FPAR(x,t) = [FPAR(x,t)_{SR} + FPAR(x,t)_{NDVI}]/2 \quad (3)$$

$$FPAR(x,t)_{NDVI} = \frac{(NDVI(x,t) - NDVI_{min})}{(NDVI_{i,max} - NDVI_{i,min})} \times (FPAR_{max} - FPAR_{min}) + FPAR_{min} \quad (4)$$

$$FPAR(x,t)_{SR} = \frac{(SR(x,t) - SR_{min})}{(SR_{max} - SR_{min})} \times (FPAR_{max} - FPAR_{min}) + FPAR_{min} \quad (5)$$

$$SR(x,t) = [1 + NDVI(x,t)]/[1 - NDVI(x,t)] \quad (6)$$

Where  $NDVI_{i,max}$  and  $NDVI_{i,min}$  is the maxim and minim value of NDVI corresponding to different plant types obtained from Land Cover Products of China, which is provided by Environmental and Ecological Science Data Center for West China, National Natural Science Foundation of China (<http://westdc.westgis.ac.cn>)(Youhua et al., 2010),  $FPAR_{min}$  and  $FPAR_{max}$  is 0.001 and 0.95 which is independent with vegetation types.  $SR_{i,max}$  and  $SR_{i,min}$  represent the 95% and 5% of NDVI of the different vegetation.

The algorithm for light use efficiency can be expressed as follows:

$$\varepsilon(x,t) = T_{\varepsilon 1}(x,t) \times T_{\varepsilon 2}(x,t) \times W_{\varepsilon}(x,t) \times \varepsilon_{max} \quad (7)$$

where  $T_{\varepsilon 1}(x,t)$  and  $T_{\varepsilon 2}(x,t)$  are the temperature stress coefficients, which reflect the reduction of light-use efficiency caused by a temperature factor (Field et al., 1995),  $W_{\varepsilon}(x,t)$  is the moisture stress coefficient which indicates the reduction in light use efficiency caused by the moisture factor(Field et al., 1995), and  $\varepsilon_{max}$  is the maximum light use efficiency under ideal conditions and can be set to different constant parameters for different vegetation types. The value of  $\varepsilon_{max}$  for grassland is  $0.542 \text{ gC} \cdot \text{MJ}^{-1}$  and  $0.429 \text{ gC} \cdot \text{MJ}^{-1}$  for shrubs in this study, in accordance with the study of (Zhu et al., 2007). A more detailed description of this algorithm can be found in(Yu et al., 2011; Zhu et al., 2007).

#### 2.4 Method for verifying NPP estimation results

Observation data are required for the verification of the NPP estimation results obtained by the CASA model, and the present study used the determination coefficient ( $R^2$ ) and the root-mean-square error (RMSE) of the linear fit (goodness-of-fit):

$$RMSE = \sqrt{\frac{\sum_{i=1}^n (P_i - O_i)^2}{n}} \quad (8)$$

where  $P_i$  and  $O_i$  represent the estimated and observed values, respectively ( $i = 1, 2, \dots, n$ , where  $n$  represents the number of samples).



## 2.5 Correlation and partial correlation analyses between the NPP and the climate factors

Pixel-based correlation coefficients and partial correlation coefficients between derived NPP and temperature and precipitation data were calculated at annual and seasonal scales to assess correlations between NPP and temperature and precipitation.

Correlation coefficients were calculated as follows:

$$R_{xy} = \frac{\sum_{i=1}^n [(x_i - \bar{x})(y_i - \bar{y})]}{\sqrt{\sum_{i=1}^n (x_i - \bar{x})^2 \sum_{i=1}^n (y_i - \bar{y})^2}} \quad (9)$$

where  $x$  and  $y$  represent two variables;  $\bar{x}$  and  $\bar{y}$  represent the mean values of  $x$  and  $y$ , respectively;  $R_{xy}$  represents the correlation coefficient between  $x$  and  $y$ ; and  $n$  represents the number of samples.

We used partial correlation analysis where:

$$r_{123} = \frac{r_{12} - r_{13}r_{23}}{\sqrt{(1 - r_{13}^2)(1 - r_{23}^2)}} \quad (10)$$

and  $r_{12}$ ,  $r_{13}$  and  $r_{23}$  represent the correlation coefficients between variables  $X_1$  and  $X_2$ , between variables  $X_1$  and  $X_3$  and between variables  $X_2$  and  $X_3$ , respectively.  $r_{123}$  represents the partial correlation coefficient between  $X_1$  and  $X_2$  when  $X_3$  is the control variable.

The partial correlation equation above was used to calculate partial correlation coefficients between NPP and temperature when precipitation was the control variable, as well as partial correlation coefficients between NPP and precipitation when temperature was the control variable.

## 3 Results

### 3.1 Verification of NPP estimates

Monitoring data from 46 monitoring stations were compared with simulated NPP for 2011 (Fig. 2). The estimated NPP was the sum of NPP from January to July because the investigating data was collected from the end of July. The correlation between simulated and measured values was based on geographic coordinates of each station (Fig. 1).

The correlation coefficient ( $R^2$ ) of 0.67 ( $P < 0.0001$ ) indicates a reasonably strong, linear relationship between estimated and observed values. On this basis, we then used estimates from the CASA model to further analyse spatiotemporal changes in NPP, as well as assess relationships to climate.

### 3.2 Inter-annual changes in the NPP, precipitation and temperature

Fig. 3a shows annual mean NPP, and NPP anomalies, for the vegetation in the Xilingol League between 2001 and 2013. Mean NPP varied between 141 and 313  $\text{g C m}^{-2} \text{ year}^{-1}$ , with a 13-year mean of 240  $\text{g C m}^{-2} \text{ year}^{-1}$ . Total NPP exhibited an increasing but insignificant ( $r^2 = 0.11$ ,  $p = 0.274$ ) trend with time.

Between 2001 and 2013, differences between annual NPP and long-term (13 year) means exhibited a sinusoidal shape. As with NPP, precipitation generally increased and was greatest (361 mm) in 2012, some 58% greater than the multi-year mean (Fig.3b). Precipitation totals for 2001 and 2005 were relatively low, some 29% and 28% less than multi-year mean precipitation, respectively. Mean annual temperatures varied between 4.58°C in 2007 and 1.62°C in 2012, with a period mean of 3.36°C (Fig. 3c). Overall, mean annual temperature declined during the study period ( $r^2 = 0.279$ ,  $p = 0.06$ ).

Fig. 4 shows the spatial distribution of NPP in the Xilingol League between 2001 and 2013. NPP in most regions was  $<500 \text{ g C m}^{-2} \text{ year}^{-1}$ . NPP in Abag Banner, Sonid Left Banner and Jurh in the western Xilingol League was between 100 and  $300 \text{ g C m}^{-2} \text{ year}^{-1}$ , but was  $< 100 \text{ g C m}^{-2} \text{ year}^{-1}$  in some regions of Erenhot. NPP significantly increased from west to east, and in West Ujimqin Banner and East Ujimqin Banner, NPP was between 300 and  $700 \text{ g C m}^{-2} \text{ year}^{-1}$ .

### 3.3 Analysis of the relationships between NPP and precipitation and temperature

NPP, precipitation and temperature for each county were averaged according to season. Correlations between precipitation and temperature and NPP are shown in Table 1.

Annual NPP was mostly positively correlated with annual precipitation (Table 1). Strong correlations were observed for East Ujimqin Banner, Naranbulag (Abag Banner), Abag Banner, Jurh (Sonid Right Banner), Xilinhote and Duolun. Conversely, NPP was generally negatively correlated with mean temperature, albeit not significantly. These overall patterns were not always borne out at regional and seasonal scales. For example, Spring temperatures were much more influential of Spring NPP than annual temperatures were of annual NPP. Similarly, Summer precipitation was particularly important to summer NPP (Table 1). There were numerous regional exceptions. NPP for Erenhot, Sonid Left Banner and West Ujimqin Banner were seldom well predicted by either precipitation or temperature and only Spring temperatures had significant predictive power for NPP in these counties.

### 3.4 Spatial relationships between the annual NPP and precipitation and temperature

To further analyse spatial relationships between NPP and precipitation and temperature, we calculated correlation coefficients ( $R$ , Equation 4) and partial correlation coefficients ( $R_p$ , Equation 5) between the annual NPP of each pixel of the study area and annual precipitation and annual mean temperature between 2001 and 2013 (Fig. 5).

Using temperature as the control factor (Fig. 5a) there were no significant spatial or quantitative differences between  $R$  and  $R_p$  for the relationship between NPP and precipitation. In most regions in the Xilingol League, NPP was significantly positively correlated with precipitation, with  $R$  ranging from 0.6 to 1.0. NPP was negatively correlated with precipitation in only 0.32% of regions in the Xilingol League, with a mean correlation coefficient of 0.34. After the effect of the temperature was removed ( $R_p$ , Fig. 5b), there was almost no change in the relationship between the precipitation and the NPP in the study area.

Figs. 5c and d show negative correlations in most regions (99%) between NPP and temperature, before the removal of the precipitation effect.  $R$  ranged from -0.8 to 0. In around 1% of the regions in the study area, NPP was positively (but not significantly) correlated with annual mean temperature. After the effect of the precipitation was removed, 77% of regions showed a positive

partial correlation between NPP and annual temperature (Fig. 5d).

### 3.5 Pixel-scale seasonal relationships between NPP and precipitation and temperature

Our study only investigated precipitation and temperature influences on NPP for Spring, Summer and Autumn owing to snow cover and lack of growth in Winter. At an even greater level of spatial detail, we calculated  $R$  and  $R_p$  for relationships between NPP and climatic variables (precipitation and temperature) between 2001 and 2013 at the pixel scale. Fig. 6 a – f shows that  $R$  and  $R_p$  for NPP and precipitation changed little across spring, summer and autumn. NPP was mostly positively correlated with precipitation. Negative relationships between NPP and precipitation were only significant in Spring, mostly after the effect of temperature was removed, and were largely confined to the south-west portion (Fig 6a, b).

Temperature effects on NPP were more variable (Fig. 6g – l). Mostly positive relationships in Spring were replaced by negative or neutral relationships in Summer (especially) and Autumn. High summer temperatures are clearly detrimental to NPP for much of the total study area. Most of the temperature effects were strongly mitigated by rainfall (contrast  $R$  and  $R_p$  in summer).

## 4 Discussion

Our data for NPP in the study region are quantitatively similar to those reported using other approaches. For example, Li and Ji (2004)(Li and Ji, 2003) simulated NPP of grasslands throughout Inner Mongolia using the AVIMia model (Atmosphere-Vegetation Interaction Model and an impact assessment) and found that the multi-year mean NPP ranged from 223 to 315 g C m<sup>-2</sup> year<sup>-1</sup>. Zhu et al. (2007)(Zhu et al., 2007) assessed the distribution of NPP of the terrestrial vegetation of China between 1989 and 1993 using an improved CASA model with AVHRR NDVI values as the input data. Their results suggested that NPP of meadows, plain grasslands and desert grasslands was 383 g C m<sup>-2</sup> year<sup>-1</sup>, 226 g C m<sup>-2</sup> year<sup>-1</sup> and 103 g C m<sup>-2</sup> year<sup>-1</sup>, respectively. Our data suggest NPP of the Xilingol Grassland slightly increased over the 13-year study period. Zhang (2014)(Zhang et al., 2014) analysed the dynamics of Xilingol Grassland in the growing season (April–October) between 2003 and 2012 using NDVI data and noted a similar trend. Li (2012)(Li et al., 2012) also used a NDVI-based method and recorded that the condition of the grasslands had improved between 2000 and 2006, consistent with results obtained by Jiang et al. (2006) through experimentation at fixed locations(Jiang et al., 2006). The analysis provided here, via integration of validated modelling with remote sensing, offers opportunity to extend such studies to other grassland regions in China and more globally.

Precipitation and temperature are well-known climatic influences on grassland productivity (Su et al., 2015; Wu et al., 2011), with the former being especially significant in arid regions(Li, 2000; Lü et al., 2014; Yang et al., 2008). The results of this study support this general interpretation; positive correlations between annual NPP and precipitation in most regions of the study area demonstrate the strength of control. In addition, negative correlations between temperature and NPP were mostly conditional upon precipitation. These effects are seen most clearly via the differences between  $R$  and  $R_p$  for the relationships of precipitation and temperature to NPP (Fig. 5a and b and Fig. 6a–f).

More detailed analysis (see Fig. A1a, c, e and g) shows that the distribution ranges of correlation coefficients for the relationship between NPP and precipitation, were unaffected by removing temperature. In simple terms, temperature had no impact on the relationship between precipitation and NPP. Conversely, temperature effects were clearly precipitation dependent. For example, at the annual scale, when precipitation effects were included, NPP in the study area was negatively correlated with temperature in 99% of regions (Fig. 5c and Fig. A1b). However, when precipitation was removed (Fig. 5d and Fig. A1b), there was a positive correlation in 77% of regions. This pattern is clearly related to the biology of plant growth. Increased temperatures when water is readily available stimulates growth (Dou et al., 2009; Huang et al., 2014). Under drought conditions, high temperatures can severely reduce growth (Shen et al., 2012). Consequently, correlations and partial correlations between NPP and temperature were consistently positive in Spring (Fig. 6g and h and Fig. A1d) and mainly negative in Summer (Fig. 6i and j and Fig. A1f) and autumn (Fig. 6k and l and Fig. A1h).

As is commonly recognized, aside from precipitation and temperature, NPP is also subject to the influence of other environmental/climate factors and human activities (Luo et al., 2008; Zhang et al., 2015b). For example, while Zhao (2010) (Zhao and Running, 2010) found that high temperatures and droughts between 2000 and 2009 were primary causes of reduced global NPP, and Han et al. (2006) found that precipitation and temperature, contributed almost 60% of the variation in the total biomass (Han et al., 2006), human activities remain one of the main reported causes of grassland degradation (Akiyama and Kawamura, 2007; Zhao et al., 2005; Zheng et al., 2006). Our assessment is that numbers of grazing livestock declined between 2001 and 2013, and were not significantly related to NPP (Fig. A2). In contrast, using a NDVI-based method Li et al. (2012) concluded that human activities (grazing) were the main driving factor of changes in the vegetation between 1981 and 2006 (Li et al., 2012).

## 5 Conclusions

Through the calculation of NPP of the Xilingol Grassland between 2001 and 2013, the present study analysed the relationships between the NPP and the climate factors at different time scales and then performed a comparison analysis to determine the effect of the climate factors on NPP of the vegetation. The results show that the CASA model can be used to estimate NPP of the Xilingol Grassland. These estimates show that the inter-annual change in NPP between 2001 and 2013 exhibited a slight increasing, albeit insignificant, trend over the 13-year period. The correlation and partial correlation analyses of the NPP and the precipitation and temperature show that the NPP was relatively highly positively correlated with the precipitation regardless of the temporal scale, but its relationship with temperature varied between the annual and seasonal time scales. At the annual scale, the correlation coefficients between the NPP and the temperature were mostly negative, whereas the partial correlations were mostly positive. The relationship between NPP and temperature also varied between different seasons, and due to the relatively low precipitation, the NPP was mainly affected by the temperature in spring. However, the NPP was controlled by both the precipitation and temperature in summer and autumn. In addition, a simple analysis of the relationship between grazing and the NPP was also performed in the study period, and the NPP was not found to be significantly correlated with grazing intensity.

## Acknowledgements

This research was supported by the National Natural Science Foundation of China (No. 51569017, 51269014, 31360113 and 51169013), the Program for Changjiang Scholars and Innovative Research Team of Chinese Ministry of Education (IRT13069), the Natural Science Foundation of Inner Mongolia (2015MS0514) and the Western Region China Postdoctoral Science Foundation (2015M572630XB). Further, we would like to thank the two anonymous reviewers for substantially improving the manuscript.

## References

- Akiyama, T. and Kawamura, K.: Grassland degradation in China: Methods of monitoring, management and restoration, *Grassland Science*, 53(1), 1–17, doi:10.1111/j.1744-697X.2007.00073.x, 2007.
- An, N., Price, K. P. and Blair, J. M.: Estimating above-ground net primary productivity of the tallgrass prairie ecosystem of the Central Great Plains using AVHRR NDVI, *International Journal of Remote Sensing*, 34(11), 3717–3735, doi:10.1080/01431161.2012.757376, 2013.
- Chirici, G., Chiesi, M., Corona, P., Puletti, N., Mura, M. and Maselli, F.: Prediction of forest NPP in Italy by the combination of ground and remote sensing data, *European Journal of Forest Research*, 134(3), 453–467, doi:10.1007/s10342-015-0864-4, 2015.
- Conrad, O., Bechtel, B., Bock, M., Dietrich, H., Fischer, E., Gerlitz, L., Wehberg, J., Wichmann, V. and Böhner, J.: System for Automated Geoscientific Analyses (SAGA) v. 2.1.4, *Geoscientific Model Development*, 8(7), 1991–2007, doi:10.5194/gmd-8-1991-2015, 2015.
- Dou, J., Liu, J., Wang, Y. and Zhao, G.: Effects of simulated soil warming on the growth and physiological characters of *Deyeuxia angustiolia* (In Chinese), *Chinese Journal of Applied Ecology*, 20(8), 1845–1851, 2009.

Fang, J.: *Global Ecology-Climate Change and Ecological Responses* (In Chinese), China: Higher Education Press and SpringerVerlag Heidelberg, Beijing., 2002.

Field, C. B., Randerson, J. T. and Malmstrom, C. M.: Global net primary production: combining ecology and remote sensing, *Remote Sensing of Environment*, 51, 74–88, 1995.

Gang, C., Zhou, W., Li, J., Chen, Y., Mu, S., Ren, J., Chen, J. and Groisman, P. Y.: Assessing the Spatiotemporal Variation in Distribution, Extent and NPP of Terrestrial Ecosystems in Response to Climate Change from 1911 to 2000, edited by G. Bohrer, *PLoS ONE*, 8(11), e80394, doi:10.1371/journal.pone.0080394, 2013.

Gao, Y. Z., Chen, Q., Lin, S., Giese, M. and Brueck, H.: Resource manipulation effects on net primary production, biomass allocation and rain-use efficiency of two semiarid grassland sites in Inner Mongolia, China, *Oecologia*, 165(4), 855–864, doi:10.1007/s00442-010-1890-z, 2011.

Han, B., Fan, J. and Zhong, H.: Grassland biomass of communities along gradients of the Inner Mongolia grassland transect (In Chinese), *Journal of Plant Ecology*, 30(4), 553–562, 2006.

Huang, W., Wang, S., Han, B., Jiao, Z. and Han, G.: The research of grassland ecosystem response to simulated atmospheric warming (In Chinese), *Pratacultural Science*, 31(11), 2069–2076, doi:10.11829/j.issn.1001-0629.2013-0640, 2014.

Jiang, G., Han, X. and Wu, J.: Restoration and Management of the Inner Mongolia Grassland Require a Sustainable Strategy, *AMBIO: A Journal of the Human Environment*, 35(5), 269–270, doi:10.1579/06-S-158.1, 2006.

Li, A., Wu, J. and Huang, J.: Distinguishing between human-induced and climate-driven vegetation changes: A critical application of RESTREND in inner Mongolia, *Landscape Ecology*, 27(7), 969–982, doi:10.1007/s10980-012-9751-2, 2012.

- Li, B.: Ecology (In Chinese), Higher Education Press, Beijing., 2000.
- Li, F., Zeng, Y., Luo, J., Ma, R. and Wu, B.: Modeling grassland aboveground biomass using a pure vegetation index, *Ecological Indicators*, 62, 279–288, doi:10.1016/j.ecolind.2015.11.005, 2016a.
- Li, J., Cui, Y., Liu, J., Shi, W. and Qin, Y.: Estimation and analysis of net primary productivity by integrating MODIS remote sensing data with a light use efficiency model, *Ecological Modelling*, 252(1), 3–10, doi:10.1016/j.ecolmodel.2012.11.026, 2013.
- Li, Y. and Ji, J.: Assessment of the productivity and livestock carrying capacity of Inner Mongolia grassland by regional scale modeling (In Chinese), *Journal of Natural Resources*, 19(5), 610–616, 2003.
- Li, Z., Chen, Y., Wang, Y. and Fang, G.: Dynamic changes in terrestrial net primary production and their effects on evapotranspiration, *Hydrology and Earth System Sciences*, 20(6), 2169–2178, doi:10.5194/hess-20-2169-2016, 2016b.
- Liu, H., Tian, F., Hu, H. C., Hu, H. P. and Sivapalan, M.: Soil moisture controls on patterns of grass green-up in Inner Mongolia: an index based approach, *Hydrology and Earth System Sciences*, 17(2), 805–815, doi:10.5194/hess-17-805-2013, 2013.
- Liu, J., Xiao, W., Guo, M., Wu, H. and Jiang, Z.: Pattern analysis of net primary productivity of China terrestrial vegetation using 3-PGS model (In Chinese), *Science Silvae Sinicae*, 47(5), 16–22, 2011.
- Lkhagva, A., Boldgiv, B., Goulden, C. E., Yadamsuren, O. and Lauenroth, W. K.: Effects of grazing on plant community structure and aboveground net primary production of semiarid boreal steppe of northern Mongolia, *Grassland Science*, 59(3), 135–145, doi:10.1111/grs.12022, 2013.
- Lü, X., Dijkstra, F. A., Kong, D., Wang, Z. and Han, X.: Plant nitrogen uptake drives responses of

productivity to nitrogen and water addition in a grassland, *Scientific Reports*, 4, 2341–2348, doi:10.1038/srep04817, 2014.

Luo, Y., Gerten, D., Le Maire, G., Parton, W. J., Weng, E., Zhou, X., Keough, C., Beier, C., Ciais, P., Cramer, W., Dukes, J. S., Emmett, B., Hanson, P. J., Knapp, A., Linder, S., Nepstad, D. and Rustad, L.: Modeled interactive effects of precipitation, temperature, and [CO<sub>2</sub>] on ecosystem carbon and water dynamics in different climatic zones, *Global Change Biology*, 14(9), 1986–1999, doi:10.1111/j.1365-2486.2008.01629.x, 2008.

Michaletz, S. T., Cheng, D., Kerkhoff, A. J. and Enquist, B. J.: Convergence of terrestrial plant production across global climate gradients, *Nature*, 512(7512), 39–43, doi:10.1038/nature13470, 2014.

Mowl, W., Blumenthal, D. M., Cherwin, K., Smith, A., Symstad, A. J., Vermeire, L. T., Collins, S. L., Smith, M. D. and Knapp, A. K.: Climatic controls of aboveground net primary production in semi-arid grasslands along a latitudinal gradient portend low sensitivity to warming, *Oecologia*, 177(4), 959–969, doi:10.1007/s00442-015-3232-7, 2015.

Mu, S., Li, J., Zhou, W., Yang, H., Zhang, C. and Ju, W.: Spatial-temporal distribution of net primary productivity and its relationship with climate factors in Inner Mongolia from 2001 to 2010 (In Chinese), *Acta Ecologica Sinica*, 33(12), 3752–3764, 2013.

Nemani, R. R., Nemani, R. R., Keeling, C. D., Tucker, C. J., Myneni, R. B. and Running, S. W.: Climate-Driven Increases in Global Terrestrial Net Primary Production from 1982 to 1999, *Science*, 300(2003), 1560–1563, doi:10.1126/science.1082750, 2003.

Potter, C., Klooster, S. and Genovese, V.: Net primary production of terrestrial ecosystems from 2000 to 2009, *Climatic Change*, 115(2), 365–378, doi:10.1007/s10584-012-0460-2, 2012.



Potter, C. S., Randerson, J. T., Field, C. B., Matson, P. A., Vitousek, P. M., Mooney, H. A. and Klooster, S. A.: Terrestrial ecosystem production: A process model based on global satellite and surface data, *Global Biogeochemical Cycles*, 7(4), 811–841, doi:10.1029/93GB02725, 1993.

Raich, A. J. W., Rastetter, E. B., Melillo, J. M., Kicklighter, D. W., Steudler, P. A., Grace, A. L., Iii, B. M. and Vörösmarty, C. J.: Potential Net Primary Productivity in South America : Application of a Global Model, *Ecological Applications*, 1(4), 399–429 [online] Available from: <http://www.jstor.org/stable/1941899> (Accessed 22 February 2017), 1991.

Reeves, M. C., Moreno, A. L., Bagne, K. E. and Running, S. W.: Estimating climate change effects on net primary production of rangelands in the United States, *Climatic Change*, 126(3–4), 429–442, doi:10.1007/s10584-014-1235-8, 2014.

Shen, W., Li, H., Sun, M. and Jiang, J.: Dynamics of aeolian sandy land in the Yarlung Zangbo River basin of Tibet, China from 1975 to 2008, *Global and Planetary Change*, 86, 37–44, doi:10.1016/j.gloplacha.2012.01.012, 2012.

Sjöström, M., Zhao, M., Archibald, S., Arneth, A., Cappelaere, B., Falk, U., de Grandcourt, A., Hanan, N., Kergoat, L., Kutsch, W., Merbold, L., Mougou, E., Nickless, A., Nouvellon, Y., Scholes, R. J. J., Veenendaal, E. M. M. and Ardö, J.: Evaluation of MODIS gross primary productivity for Africa using eddy covariance data, *Remote Sensing of Environment*, 131, 275–286, doi:10.1016/j.rse.2012.12.023, 2013.

Soylu, M. E., Istanbuluoglu, E., Lenters, J. D. and Wang, T.: Quantifying the impact of groundwater depth on evapotranspiration in a semi-arid grassland region, *Hydrology and Earth System Sciences*, 15(3), 787–806, doi:10.5194/hess-15-787-2011, 2011.

Su, H., Feng, J., Axmacher, J. C. and Sang, W.: Asymmetric warming significantly affects net

primary production, but not ecosystem carbon balances of forest and grassland ecosystems in northern China, *Scientific Reports*, 5, 9115, doi:10.1038/srep09115, 2015.

Tan, K., Piao, S., Peng, C. and Fang, J.: Satellite-based estimation of biomass carbon stocks for northeast China's forests between 1982 and 1999, *Forest Ecology and Management*, 240(1), 114–121, doi:10.1016/j.foreco.2006.12.018, 2007.

Tang, G., Beckage, B., Smith, B. and Miller, P. A.: Estimating potential forest NPP, biomass and their climatic sensitivity in New England using a dynamic ecosystem model, *Ecosphere*, 1(6), art18, doi:10.1890/ES10-00087.1, 2010.

Wang, C., Han, G., Wang, S., Zhai, X., Brown, J., Havstad, K. M., Ma, X., Wilkes, A., Zhao, M., Tang, S., Zhou, P., Jiang, Y., Lu, T., Wang, Z. and Li, Z.: Sound management may sequester methane in grazed rangeland ecosystems, *Scientific Reports*, 4, 157–158, doi:10.1038/srep04444, 2014a.

Wang, X., Li, F., Gao, R., Luo, Y. and Liu, T.: Predicted NPP spatiotemporal variations in a semiarid steppe watershed for historical and trending climates, *Journal of Arid Environments*, 104, 67–79, doi:10.1016/j.jaridenv.2014.02.003, 2014b.

Wang, Y. and Wesche, K.: Vegetation and soil responses to livestock grazing in Central Asian grasslands: a review of Chinese literature, *Biodiversity and Conservation*, 25(12), 2401–2420, doi:10.1007/s10531-015-1034-1, 2016.

Wen, J., Ali, S. H. and Zhang, Q.: Property rights and grassland degradation: A study of the Xilingol Pasture, Inner Mongolia, China, *Journal of Environmental Management*, 85(2), 461–470, doi:10.1016/j.jenvman.2006.10.010, 2007.

Wu, Z., Dijkstra, P., Koch, G. W., Peñuelas, J. and Hungate, B. A.: Responses of terrestrial ecosystems to temperature and precipitation change: A meta-analysis of experimental

manipulation, *Global Change Biology*, 17(2), 927–942, doi:10.1111/j.1365-2486.2010.02302.x, 2011.

Yan, H., Liu, J., Huang, H. Q., Tao, B. and Cao, M.: Assessing the consequence of land use change on agricultural productivity in China, *Global and Planetary Change*, 67(1), 13–19, doi:10.1016/j.gloplacha.2008.12.012, 2009.

Yang, Y., Fang, J., Ma, W. and Wang, W.: Relationship between variability in aboveground net primary production and precipitation in global grasslands, *Geophysical Research Letters*, 35(23), L23710, doi:10.1029/2008GL035408, 2008.

Yang, Z.: Inner Mongolia Statistical Bureau, Inner Mongolia statistical yearbook 2002 to 2014 (In Chinese), Mongolian Renmin Press, Hohhot., 2015.

Youhua, R., Xin, L. and Ling., L.: Land Cover Products of China. Cold and Arid Regions Science Data Center at Lanzhou, ., ., doi:10.3972/westdc.007.2013.db, 2010.

Yu, D. Y., Shi, P. J., Han, G. Y., Zhu, W. Q., Du, S. Q. and Xun, B.: Forest ecosystem restoration due to a national conservation plan in China, *Ecological Engineering*, 37(9), 1387–1397, doi:10.1016/j.ecoleng.2011.03.011, 2011.

Zhang, C., Wang, M., Wulanbater and Jiang, X.: Response of ANPP to climate change in Inner Mongolia typical steppes - s simulation study (In Chinese), *Acta Botanica Boreali-Occidentalia Sinica*, 32(6), 1229–1237, 2012.

Zhang, F., Zhou, G. and Wang, Y.: Dynamics simulation of net primary productivity by a satellite data-driven CASA model in Inner Mongolian typical steppe, China (In Chinese), *Journal of Plant Ecology*, 32(4), 786–797, doi:10.3773/J.ISSN.1005-264X.2008.04.007, 2008.

Zhang, M., Lal, R., Zhao, Y., Jiang, W. and Chen, Q.: Estimating net primary production of natural

grassland and its spatio-temporal distribution in China, *Science of The Total Environment*, 553, 184–195, doi:10.1016/j.scitotenv.2016.02.106, 2016.

Zhang, S., Zhao, H., Zhang, F. and Shang, S.: Temporal and spatial dynamic of Xilingol steppe based on MODIS NDVI in recent ten years (In Chinese), *Pratacultural Science*, 31(8), 1416–1423, doi:10.11829/j.issn.1001-0629.2013-0581, 2014.

Zhang, S., Shen, R., Chen, Z., Liu, T., Enke, B. and Li, L.: Estimation of vegetation productivity in Xilingol steppe and analysis of the influencing factors - A case study in Balager river basin (In Chinese), *Chinese Journal of Grassland*, 0(4), 66–73, 2015a.

Zhang, X., Tan, Y., Li, A., Ren, T., Chen, S., Wang, L. and Huang, J.: Water and nitrogen availability co-control ecosystem CO<sub>2</sub> exchange in a semiarid temperate steppe., *Scientific reports*, 5, 15549, doi:10.1038/srep15549, 2015b.

Zhao, M. and Running, S. W.: Drought-Induced Reduction in Global Terrestrial Net Primary Production from 2000 Through 2009, *Science*, 329(5994), 940–943, doi:10.1126/science.1192666, 2010.

Zhao, W. Z., Xiao, H. L., Liu, Z. M. and Li, J.: Soil degradation and restoration as affected by land use change in the semiarid Bashang area, northern China, *CATENA*, 59(2), 173–186, doi:10.1016/j.catena.2004.06.004, 2005.

Zheng, Y. R., Xie, Z. X., Robert, C., Jiang, L. H. and Shimizu, H.: Did climate drive ecosystem change and induce desertification in Otindag sandy land, China over the past 40 years?, *Journal of Arid Environments*, 64(3), 523–541, doi:10.1016/j.jaridenv.2005.06.007, 2006.

Zhu, W., Pan, Y. and Zhang, J.: Estimation of net primary productivity of chinese terrestrial vegetation based on remote sensing (In Chinese), *Chinese Journal of Plant Ecology*, 31(3), 413–

| Station Names of stations | Correlation coefficients between the NPP and the climate factors |        |            |         |            |        |            |        |
|---------------------------|------------------------------------------------------------------|--------|------------|---------|------------|--------|------------|--------|
|                           | Annual NPP                                                       |        | Spring NPP |         | Summer NPP |        | Autumn NPP |        |
|                           | AP                                                               | AMT    | SpP        | SpMT    | SuP        | SuMT   | AuP        | AuMT   |
| East Ujimqin Banner       | 0.594*                                                           | -0.126 | 0.632*     | 0.560*  | 0.531      | -0.3   | 0.826**    | 0.073  |
| Erenhot                   | 0.135                                                            | 0.131  | 0.303      | 0.777** | 0.281      | -0.336 | 0.558*     | 0.137  |
| Naranbulag (Abag Banner)  | 0.828**                                                          | -0.452 | 0.618*     | 0.654*  | 0.803**    | -0.174 | 0.732**    | -0.079 |
| Abag Banner               | 0.775**                                                          | -0.383 | 0.657*     | 0.610*  | 0.699**    | -0.416 | 0.761**    | -0.287 |
| Sonid Left Banner         | -0.042                                                           | 0.402  | 0.54       | 0.808** | 0.094      | -0.255 | 0.337      | 0.326  |
| Jurh (Sonid Right Banner) | 0.690**                                                          | -0.126 | 0.582*     | 0.759** | 0.665*     | -0.054 | 0.605*     | 0.079  |
| West Ujimqin Banner       | 0.465                                                            | -0.107 | 0.382      | 0.762** | 0.534      | -0.251 | 0.275      | 0.267  |
| Xilinhot                  | 0.682*                                                           | -0.304 | 0.453      | 0.751** | 0.53       | -0.525 | 0.738**    | -0.089 |
| Duolun                    | 0.778**                                                          | -0.284 | 0.151      | 0.701** | 0.646*     | -0.467 | 0.748**    | -0.331 |

**Table 1. Correlation coefficients ( $r$ ) between annual and seasonal NPP and climate variables**

AP = annual mean precipitation; AMT = annual mean temperature; SpP = spring precipitation; SpMT = spring mean temperature; SuP = summer precipitation; SuMT = summer mean temperature; AuP = autumn precipitation; AuMT = autumn mean temperature.

\* indicates a significant correlation at the 0.05 level (two-tailed).

\*\* indicates a significant correlation at the 0.01 level (two-tailed).

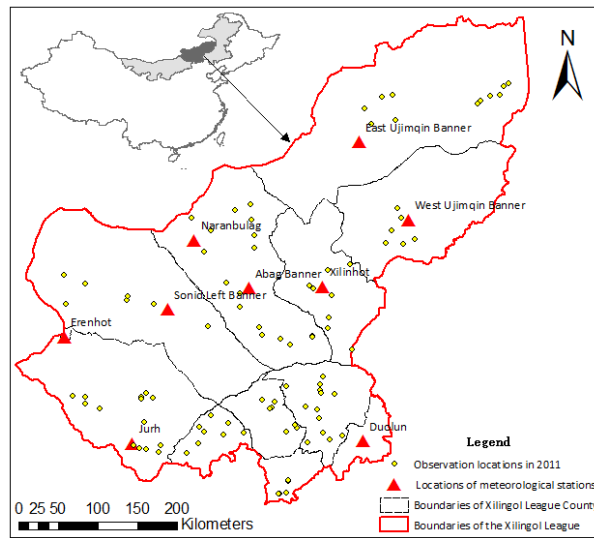

**Figure 1. Study area and locations of meteorological stations and observation locations in 2011.**

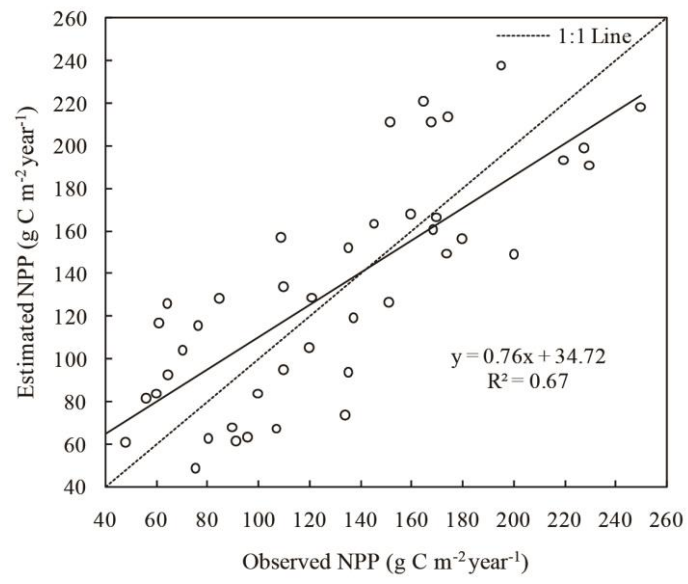

**Figure 2. Correlation between the estimated and observed NPP**

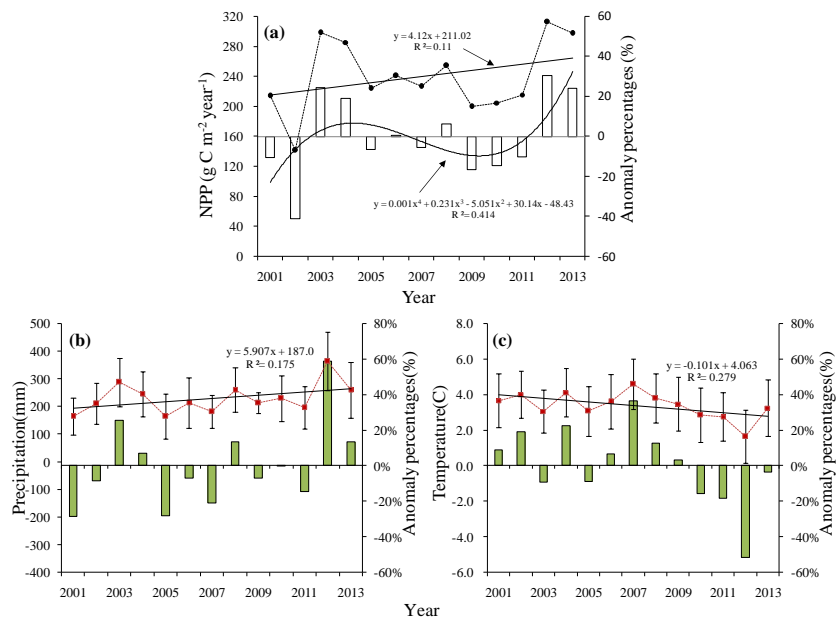

**Figure 3. Changes in the NPP, precipitation and temperature in the study area between 2001 and 2013.**

**a:** Mean NPP (dotted line), linear regression of the mean NPP (straight line), difference between annual NPP and long-term NPP (histogram), and linear regression of the difference between annual NPP and long-term NPP (straight line). **b:** Mean precipitation (dotted line), linear regression of the mean precipitation (straight line) and difference between annual and long-term precipitation (histogram). **c:** Mean temperature (dotted line), linear regression of mean temperature and difference between annual and long-term temperature (histogram).



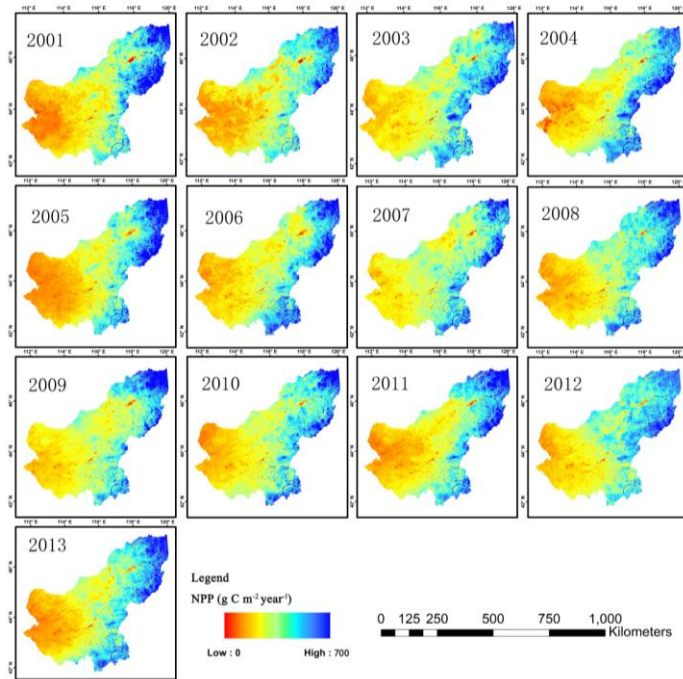

**Figure 4. Spatial distribution of the annual total NPP between 2001 and 2013**

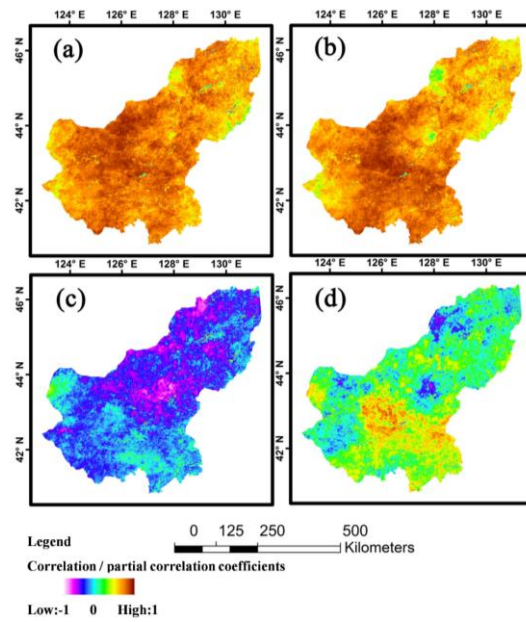

Figure 5. Correlation coefficients and partial correlation coefficients between annual mean NPP and climate variables

a: Correlation analysis between NPP and precipitation. b: Partial correlation analysis between NPP and precipitation. c: Correlation analysis between NPP and temperature. d: Partial correlation analysis between NPP and temperature.

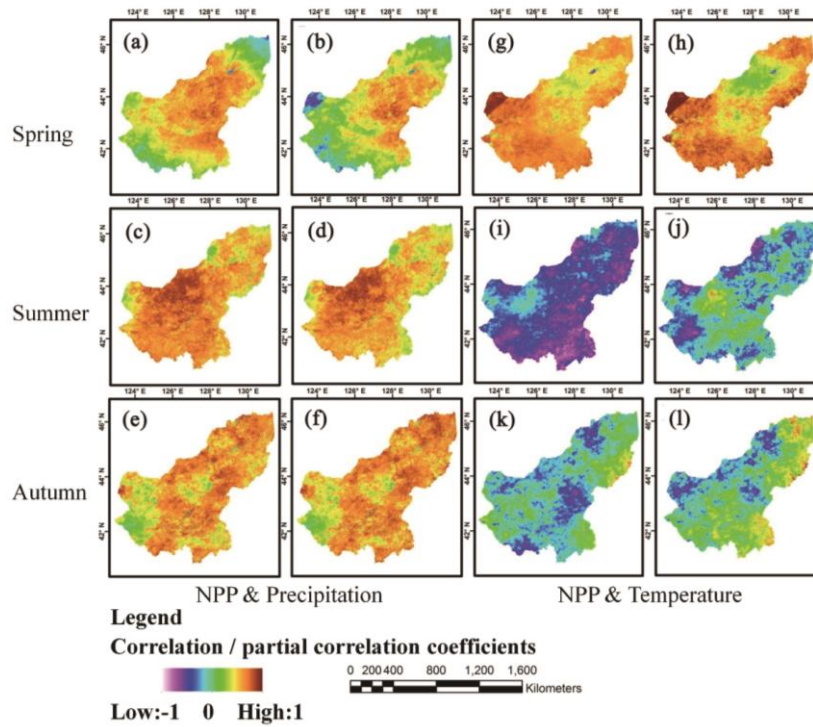

Figure 6. Analysis of correlations and partial correlations between NPP and climate variables across seasons.

a, c, e Correlation analysis of NPP and precipitation. b, d, f Partial correlation analysis of NPP and precipitation.  
 g, i, k Correlation analysis of NPP and temperature. h, j, l Partial correlation analysis of NPP and temperature.

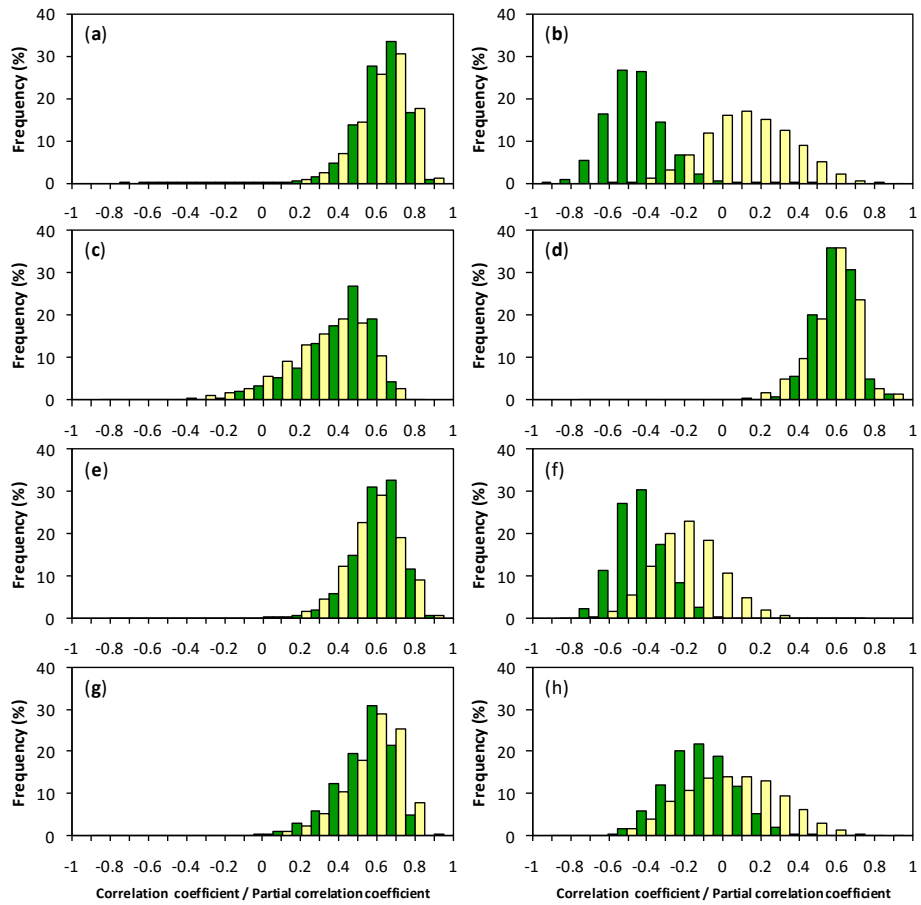

**Figure A1. Histograms of the correlation coefficients (dark green) and partial correlation coefficients (light yellow) between the NPP and the precipitation and temperature.**

**a: Annual NPP and precipitation. b: Annual NPP and temperature. c: NPP and precipitation in spring. d: NPP and temperature in spring. e: NPP and precipitation in summer. f: NPP and temperature in summer. g: NPP and precipitation in autumn. h: NPP and temperature in autumn.**

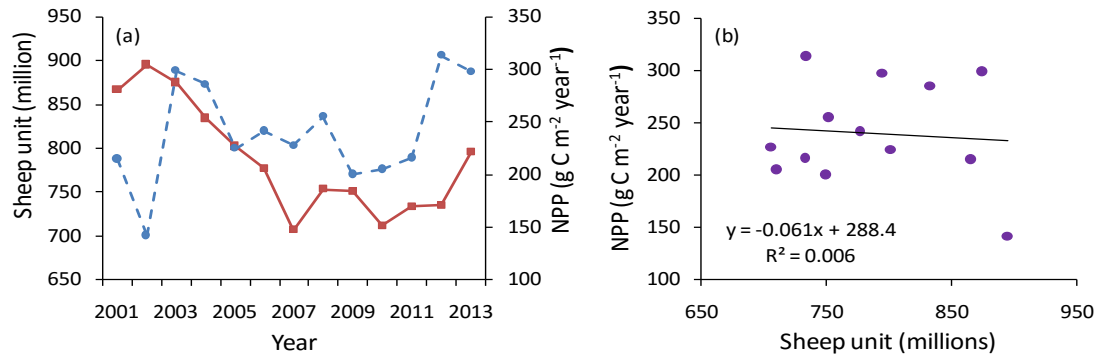

Figure A2. (a) Number of livestock (solid red line) and change in the NPP (broken blue line) and (b) the

correlation between the number of livestock and the change in the NPP
